# Supplementary material
Source: PubMed Central journal article supplement (PMC3366809)
Supplement: supp_M112.355040_jbc.M112.355040-1.pdf [file supp_M112.355040_jbc.M112.355040-1.pdf]

## Supplementary Fig 1:

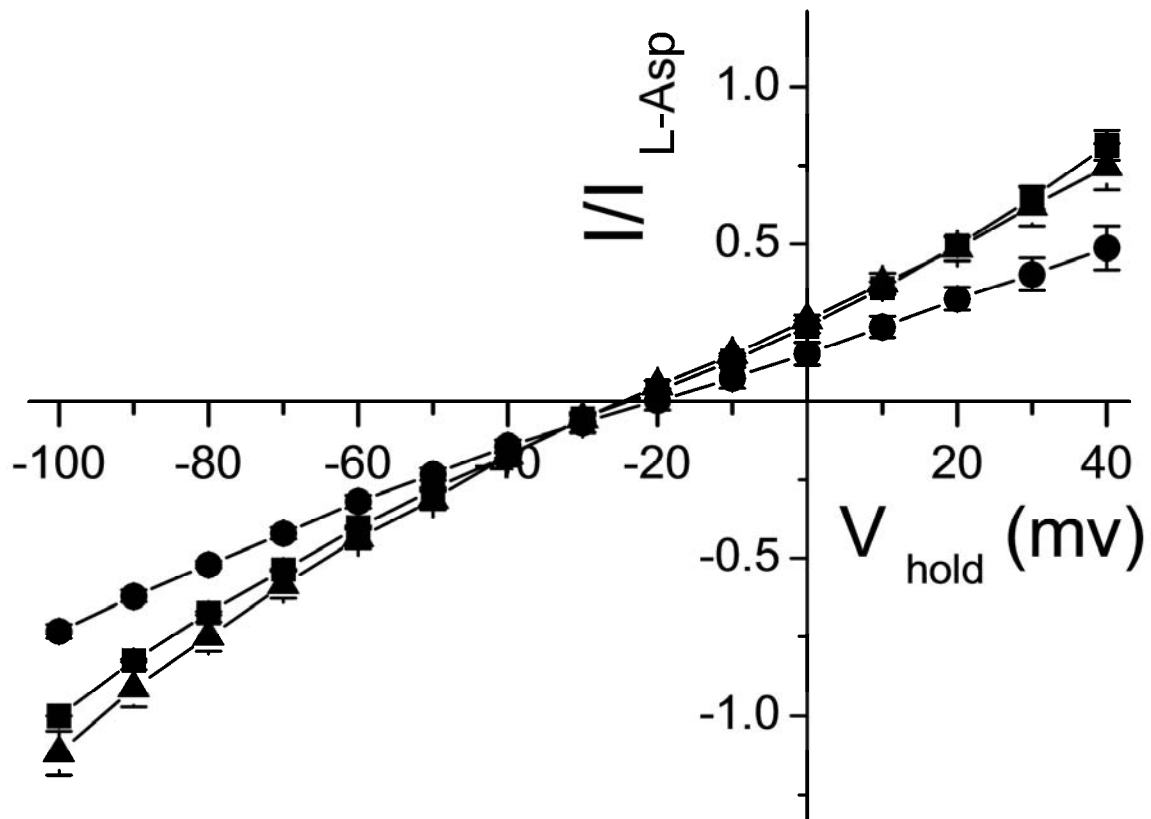

**Supplementary Figure 1:** *Substrate induced anion conductance by T370S transporters*- Currents induced by 20 mM of L-aspartate (squares), L-Glutamate (circles) and D-aspartate (triangles), under conditions where half of the NaCl was replaced by an equimolar concentration of NaSCN, are shown. The currents in the absence of substrate were subtracted from those in its presence, normalized to the current induced by L-aspartate at  $-100$  mV ( $I_{L-asp}$ ) and plotted against the holding potential ( $V_{hold}$ ). The currents (in nA) at  $-100$  mV induced by L-aspartate, L-glutamate and D-aspartate ranged from  $-280$  to  $-1020$ , from  $-211$  to  $-716$  and from  $-312$  to  $-1013$  respectively. Data shown are mean  $\pm$  S.E. of 3 oocytes.
